# Supplementary material for: Outcomes of coronavirus 2019 infection in patients with chronic kidney disease: a systematic review and meta-analysis
Source: PubMed Central journal article supplement — Ther Adv Chronic Dis. 2021 Mar 19;12:2040622321998860. doi: 10.1177/2040622321998860 (PMC7985947; doi:10.1177/2040622321998860), 2021-03-19
Supplement: sj-pdf-2-taj-10.1177_2040622321998860.pdf [file sj-pdf-2-taj-10.1177_2040622321998860.pdf]

## Supplementary File 1

The details of search strategy in this article:

1. To acquire broader articles associated with the topic in our study, the search strategy included fewer following keywords separately and in combination at first: “COVID-19” or “coronavirus disease 2019” combined with “Renal” or “Kidney” was performed on 16th July 2020.
2. We then used the acquired following detail search terms to find all studies and databases, for example in PubMed:  
("covid 19"[All Fields] OR "covid 19 nucleic acid testing"[All Fields] OR "covid 19 serological testing"[All Fields] OR "covid 19 testing"[All Fields] OR "sars cov 2"[All Fields] OR "severe acute respiratory syndrome coronavirus 2"[All Fields] OR "ncov"[All Fields] OR "2019 ncov"[All Fields] OR (("coronavirus"[All Fields] OR "cov"[All Fields]) AND 2019/11/01:3000/12/31[Date - Publication]) OR ("covid 19"[MeSH Terms] OR "covid 19"[All Fields] OR "coronavirus disease 2019"[All Fields])) AND ("renal"[All Fields] OR "renals"[All Fields] OR ("kidney"[MeSH Terms] OR "kidney"[All Fields] OR "kidneys"[All Fields] OR "kidney s"[All Fields]))
3. Two authors exactly reviewed the abstracts and obtained the full texts of studies for which patients with chronic kidney disease.
4. Moreover, two authors then selected out those articles including outcome terms (all-cause mortality, hospitalization, and critical or severe condition. The critical condition consisted of respiratory failure, endotracheal tube intubation, major adverse cardiovascular events, septic shock, and any admission in the intensive care unit) after reviewing the full texts of studies.”
